# Supplementary figures and images for: Anti-Proliferative and Cytoprotective Activity of Ethylenediurea Derivatives with Alkyl and Oxygen-containing Groups as Substituents
Source: Preprints.org preprint supplement (doi:10.20944/preprints202405.1732.v1), 2024-05-27

*
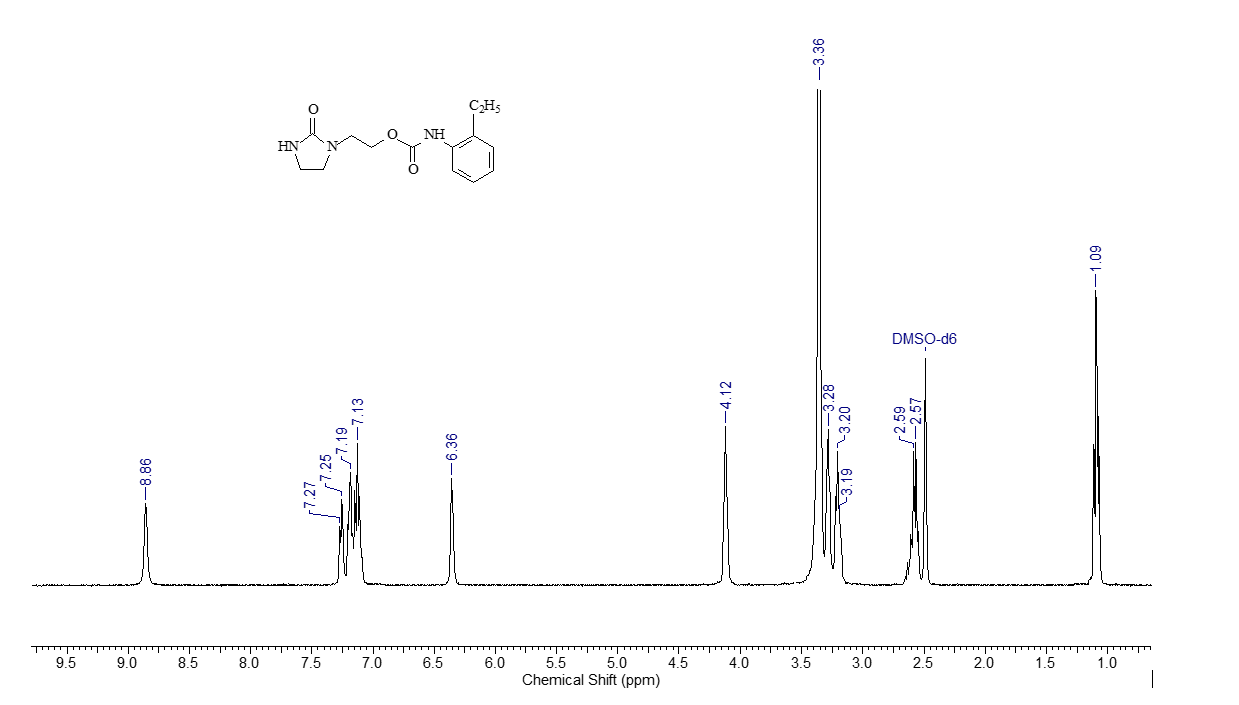
*


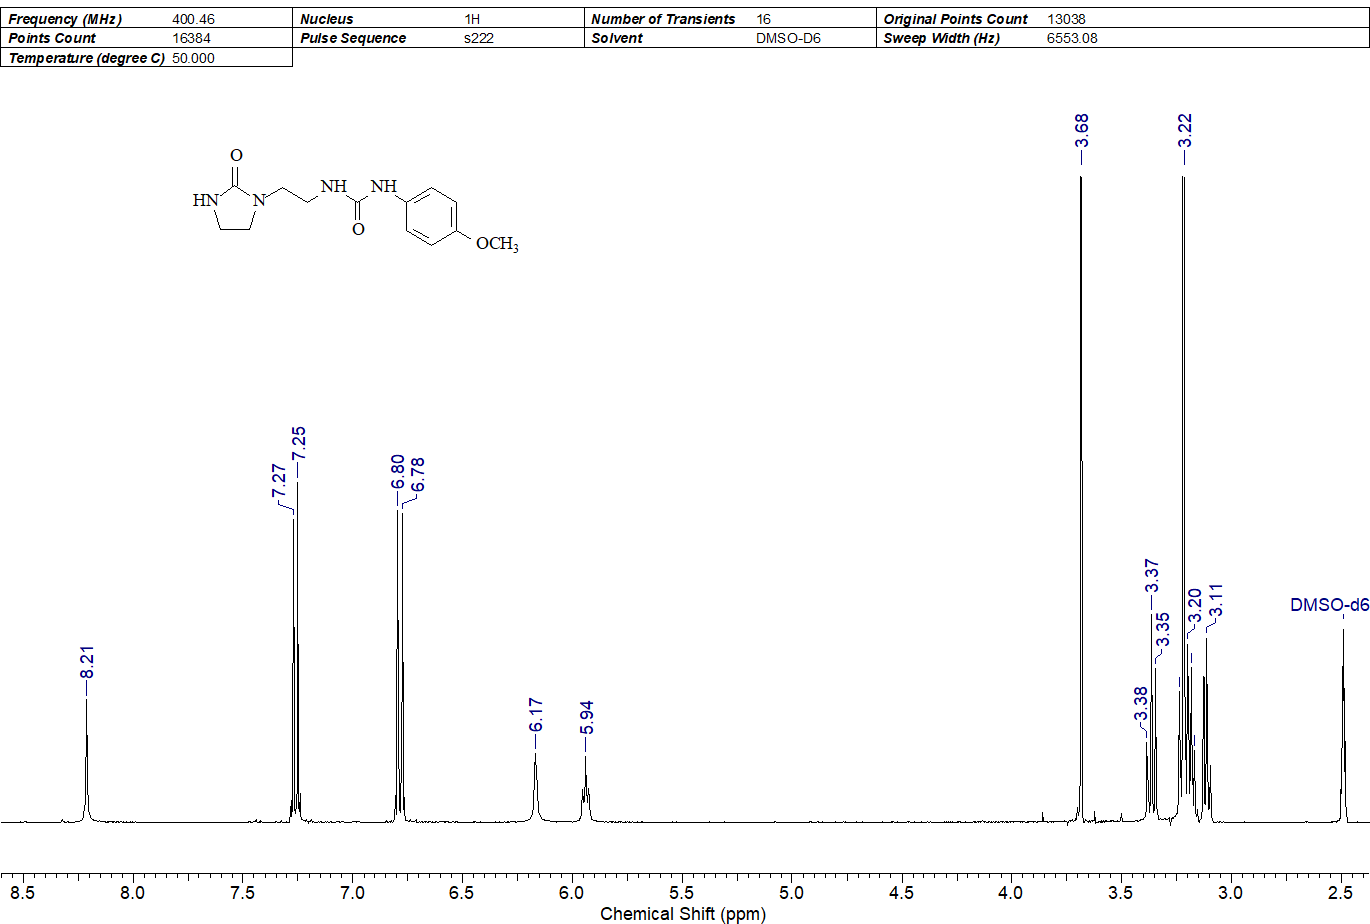

Supplement: Supplementary file 1 [file supplementary]
